# Supplementary material
Source: Springer Nature journal article supplement (https://www.springermedizin.de/resource/supplementary/12884_2013_1086_MOESM5_ESM.pdf/9458810)

**a**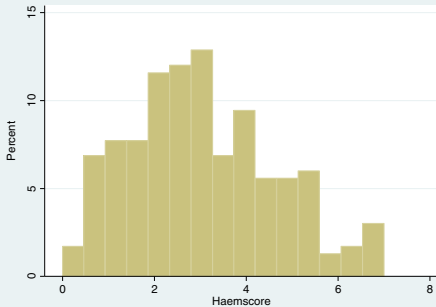**b**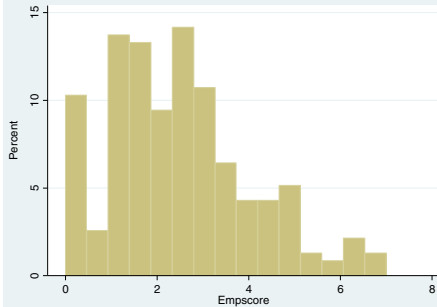

Supplement: MOESM5 [file 9458810]
